# Supplementary material
Source: PubMed Central journal article supplement (PMC4324010)
Supplement: NIHMS641542-supplement-01.pdf [file NIHMS641542-supplement-01.pdf]

***Supplemental Figure 1***

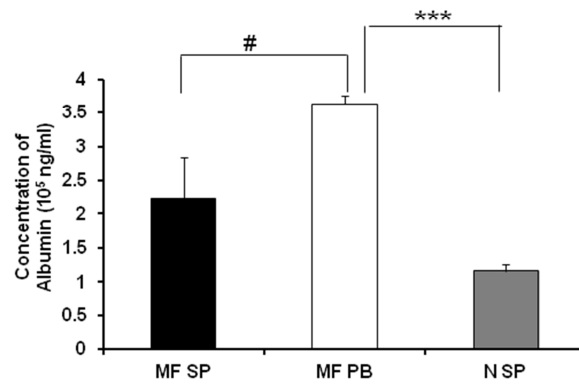

**Supplemental Figure 1 Concentrations of albumin in MF splenic, PB plasma and normal splenic plasma.** The concentration of albumin was higher in MF PB plasma than that determined in MF splenic plasma and normal splenic plasma. <sup>#</sup>, P=0.058;\*\*\*, P<0.001. MF SP: myelofibrosis splenic plasma; MF PB: myelofibrosis peripheral blood plasma; N SP: normal splenic plasma. MF splenic and PB plasma: n=6; Normal splenic plasma: n=7.

**Supplemental Figure 2**

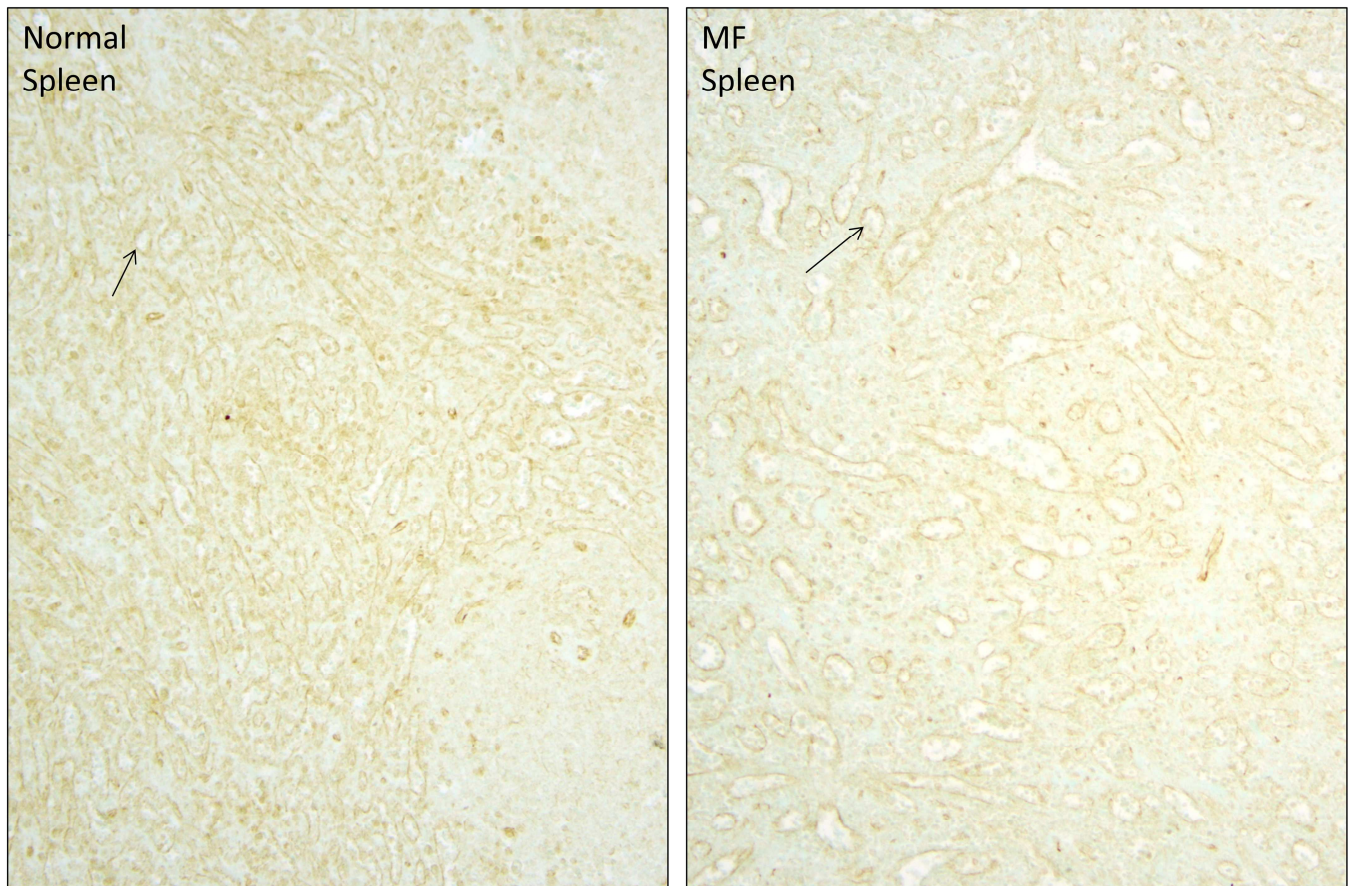

**Supplemental Figure 2 Immunohistochemical analyses of CXCL12 expression in normal and myelofibrosis (MF) spleens.** Sections of normal and MF spleens were stained with antibodies specific for CXCL12. The morphology of the majority of cells that were labeled positive for CXCL12 in normal and MF spleen included vascular cells lining splenic sinusoids and endothelial cells lining capillaries (Arrow). There were also a limited numbers of additional cells that stained positive for CXCL12 which could represent reticular cells/mesenchymal cells/fibroblasts.
